# Supplementary material for: N,N-Dimethylformamide-induced phase separation of hexafluoroisopropanol–water mixtures
Source: Royal Society of Chemistry journal article supplement (doi:10.1039/c0cp00338g), 2011-01-01
Supplement: c0cp00338g.pdf [file c0cp00338g.pdf]

**Electronic Supplementary Information**

***N,N*-Dimethylformamide-induced phase separation of  
hexafluoroisopropanol–water mixtures**

Toshiyuki Takamuku,<sup>\*,a</sup> Takuya Shimomura,<sup>a</sup> Mai Tachikawa<sup>a</sup> and Ryo Kanzaki<sup>b</sup>

<sup>a</sup> *Department of Chemistry and Applied Chemistry, Graduate School of Science and Engineering, Saga University, Honjo-machi, Saga 840-8502, Japan; E-mail: takamut@cc.saga-u.ac.jp.*

<sup>b</sup> *Graduate School of Science and Engineering, Kagoshima University, Korimoto, Kagoshima 890-0065, Japan*

Table S1 Intramolecular atom–atom bond lengths and notation of the atoms in DMF and the potential parameters utilized for the MD simulations.

| Intramolecular Atom–Atom Bond Lengths |        |                |
|---------------------------------------|--------|----------------|
| Molecule                              | Bond   | $r / \text{Å}$ |
| DMF                                   | C1–H11 | 1.090          |
|                                       | C1–H12 | 1.090          |
|                                       | C1–H13 | 1.090          |
|                                       | C2–H21 | 1.090          |
|                                       | C2–H22 | 1.090          |
|                                       | C2–H23 | 1.090          |
|                                       | C1–N   | 1.449          |
|                                       | C2–N   | 1.449          |
|                                       | C–N    | 1.335          |
|                                       | C–H    | 1.080          |
|                                       | C–O    | 1.229          |

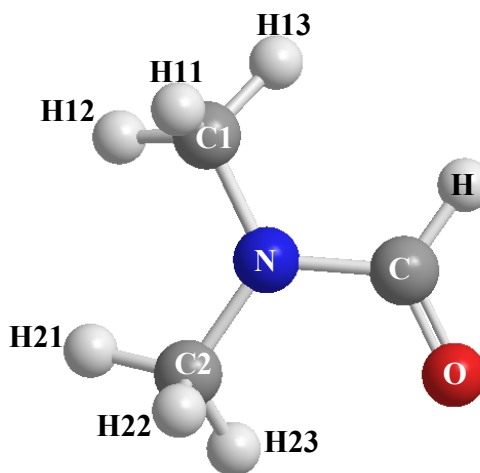

| Bond Angle Potentials |            |                                                      |                         |
|-----------------------|------------|------------------------------------------------------|-------------------------|
| Molecule              | Angle      | $K_{\theta} / \text{kcal mol}^{-1} \text{ rad}^{-2}$ | $\theta_0 / \text{deg}$ |
| DMF                   | H11–C1–H12 | 35                                                   | 109.5                   |
|                       | H11–C1–H13 | 35                                                   | 109.5                   |
|                       | H12–C1–H13 | 35                                                   | 109.5                   |
|                       | H21–C2–H22 | 35                                                   | 109.5                   |
|                       | H21–C2–H23 | 35                                                   | 109.5                   |
|                       | H22–C2–H23 | 35                                                   | 109.5                   |
|                       | H11–C1–N   | 38                                                   | 109.5                   |
|                       | H12–C1–N   | 38                                                   | 109.5                   |
|                       | H13–C1–N   | 38                                                   | 109.5                   |

(Cont.)

|          |    |       |
|----------|----|-------|
| H21-C2-N | 38 | 109.5 |
| H22-C2-N | 38 | 109.5 |
| H23-C2-N | 38 | 109.5 |
| C1-N-C2  | 50 | 118.0 |
| C1-N-C   | 50 | 121.9 |
| C2-N-C   | 50 | 121.9 |
| N-C-O    | 80 | 122.9 |
| N-C-H    | 35 | 119.1 |
| H-C-O    | 80 | 122.9 |

---

Torsion Potentials

---

| Molecule | Torsion     | $V_n/2$ / kcal mol <sup>-1</sup> | $n$ | $\phi_0$ / deg |
|----------|-------------|----------------------------------|-----|----------------|
| DMF      | H11-C1-N-C2 | 0                                | 3   | 0              |
|          | H12-C1-N-C2 | 0                                | 3   | 0              |
|          | H13-C1-N-C2 | 0                                | 3   | 0              |
|          | H21-C2-N-C1 | 0                                | 3   | 0              |
|          | H22-C2-N-C1 | 0                                | 3   | 0              |
|          | H23-C2-N-C1 | 0                                | 3   | 0              |
|          | H11-C1-N-C  | 0                                | 3   | 0              |
|          | H12-C1-N-C  | 0                                | 3   | 0              |
|          | H13-C1-N-C  | 0                                | 3   | 0              |
|          | H21-C2-N-C  | 0                                | 3   | 0              |
|          | H22-C2-N-C  | 0                                | 3   | 0              |
|          | H23-C2-N-C  | 0                                | 3   | 0              |
|          | C1-N-C-O    | 10                               | 2   | 180            |
|          | C2-N-C-O    | 10                               | 2   | 180            |
|          | C1-N-C-H    | 10                               | 2   | 180            |

(Cont.)

C2–N–C–H                      10                      2                      180

---

van der Waals Parameters and Point Charges

---

| Molecule | Atom | $\sigma / \text{Å}$ | $\epsilon / \text{kcal mol}^{-1}$ | $q / e$ |
|----------|------|---------------------|-----------------------------------|---------|
| DMF      | C1   | 3.500               | 0.066                             | -0.110  |
|          | C2   | 3.500               | 0.066                             | -0.110  |
|          | N    | 3.250               | 0.170                             | -0.140  |
|          | C    | 3.750               | 0.105                             | 0.500   |
|          | O    | 2.960               | 0.210                             | -0.500  |
|          | H11  | 2.500               | 0.030                             | 0.060   |
|          | H12  | 2.500               | 0.030                             | 0.060   |
|          | H13  | 2.500               | 0.030                             | 0.060   |
|          | H21  | 2.500               | 0.030                             | 0.060   |
|          | H22  | 2.500               | 0.030                             | 0.060   |
|          | H23  | 2.500               | 0.030                             | 0.060   |
|          | H    | 2.420               | 0.015                             | 0.000   |

---
